# Supplementary material for: Enhanced oxygen and hydrogen evolution performance by carbon-coated CoS2–FeS2 nanosheets
Source: Royal Society of Chemistry journal article supplement (doi:10.1039/d0dt02671a), 2020-01-01
Supplement: d0dt02671a1.pdf [file d0dt02671a1.pdf]

# Enhanced oxygen and hydrogen evolution performance by carbon-coated CoS<sub>2</sub>-FeS<sub>2</sub> nanosheets

Wenpin Wang,<sup>a</sup> Yue Xu,<sup>b</sup> Jiali Yao,<sup>b</sup> Xien Liu,<sup>b</sup> Zhengmao Yin<sup>c</sup> and

Zhongcheng Li<sup>\*,b</sup>

<sup>a</sup> Key Laboratory of Biobased Polymer Materials, Shandong Provincial Education Department, School of Polymer Science and Engineering, Qingdao University of Science and Technology, Qingdao 266042, China

<sup>b</sup> Key Laboratory of Optic-electric Sensing and Analytical Chemistry for Life Science, MOE, College of Chemistry and Molecular Engineering, Qingdao University of Science and Technology, Qingdao 266042, China

<sup>c</sup> College of Materials Science and Engineering, Qingdao University of Science and Technology, Qingdao 266042, China

## Corresponding Author

Dr. Zhongcheng Li

Email: zhongchengli@qust.edu.cn

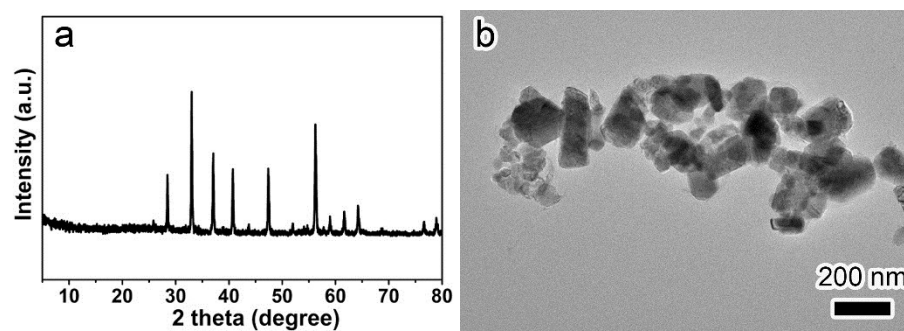

**Fig. S1** The XRD pattern (a) and TEM image (b) of FeS<sub>2</sub> nanosheets.
